# Supplementary material for: Drainage of inflammatory macromolecules from the brain to periphery targets the liver for macrophage infiltration
Source: eLife. 2020 Jul 31;9:e58191. doi: 10.7554/eLife.58191 (PMC7434444; doi:10.7554/eLife.58191)
Supplement: Supplementary file 1. [file elife-58191-supp1.xlsx]

## Sheet: Sheet1
Supplementary Table 1.
Primer	Sequence (5'->3')	Application	Reference
a2ml qpcr F	GGCTGTGCCATCCATAACT	qPCR	This study
a2ml qpcr R	CTCCGTTCCTTCTTCTGTAACC	qPCR	This study
ahr1a qpcr F	CTTCTGGTTTTCTTGCCGTG	qPCR	This study
ahr1a qpcr R	GCCATCTCCTGTACTCTCATTC	qPCR	This study
csf1a qpcr F	AGTGCTTCATCCTTGTCCTG	qPCR	This study
csf1a qpcr R	TGACAGAGTGCTTACATGGAC	qPCR	This study
csf1b qpcr F	TGTCCAGGCACTTCAAAGAG	qPCR	This study
csf1b qpcr R	GGTTAGTTGAGTTACAGTCGGG	qPCR	This study
ef1a qpcr F	ACATCCGTCGTGGTAATGTG	qPCR	Earley et al., 2018
ef1a qpcr R	TGATGACCTGAGCGTTGAAG	qPCR	Earley et al., 2018
gp130 qpcr F	GATGGAGAGGTGGAGATGATTG	qPCR	This study
gp130 qpcr R	TGCGAAGGCAGAGCATTATGG	qPCR	This study
gstp1 qpcr F	TTGAAGAGTGGATGAAGGGC	qPCR	This study
gstp1 qpcr R	TTTTCGACCCAGATGTCTCAG	qPCR	This study
il1b qpcr F	ACCGGCAGCTCCATAAAC	qPCR	Earley et al., 2018
il1b qpcr R	GGTGTCTTTCCTGTCCATCTC	qPCR	Earley et al., 2018
il-34 qpcr F	CCATCTGGGATCACTTGACTG	qPCR	This study
il-34 qpcr R	GTCATCCTCTTTTGTGAAGCAC	qPCR	This study
irg1 qpcr F	ACTGGGAGTGGGTTTGATTG	qPCR	Earley et al., 2018
irg1 qpcr R	GCATACTGAGGTGGAAGAGATG	qPCR	Earley et al., 2018
MyD88e1F	TCTTGACGGACTGGGAAACTCG	RT-PCR	Bates et al., 2007
MyD88e5R	GATTTGTAGACGACAGGGATTAGCC	RT-PCR	Bates et al., 2007
saa qpcr F	GCTGTGCTGGTGATGTTTATG	qPCR	This study
saa qpcr R	GTTCTTCCAATTGGCCTCTTTC	qPCR	This study
tnfa qpcr F	GCGCTTTTCTGAATCCTACG	qPCR	Earley et al., 2018
tnfa qpcr R	TGCCCAGTCTGTCTCCTTCT	qPCR	Earley et al., 2018
il34 genotyping F	CAGGGCATTAAGAAGGTCTTAC	genotyping (il34re03, 5bp deletion)	Kuil et al., 2019
il34 genotyping R	CAAATGATATCATTGTTCTAAC	genotyping (il34re03, 5bp deletion)	Kuil et al., 2019
myd88 genotyping F	GTAACGCGGAGATATACAACAAC	genotyping (myd88b1354, 4bp deletion)	Burns et al., 2017
myd88 genotyping R	GAAGCGAACAAAGAAAAGCAA	genotyping (myd88b1354, 4bp deletion)	Burns et al., 2017
saa genotyping F	CATGAAGCTTCTTCTTGCTGTGCTGG	genotyping (saardu60, 22bp deletion)	Murdoch et al., 2019
saa genotyping R	GGAATAACAACTGACCTCCAGCGGCTTCTCC	genotyping (saardu60, 22bp deletion)	Murdoch et al., 2019
pu.1/spi1b fh509 geno 2F	GTGGTGCATGTCTCACCTGTGG	genotyping (spi1bfh509, 10bp deletion)	Roh-Johnson et al., 2017
pu.1/spi1b fh509 geno 2R	CTACATGCGGCCAGTGTGCATC	genotyping (spi1bfh509, 10bp deletion)	Roh-Johnson et al., 2017
il-34 crispr F	GCAGGTGTTTAATAAAGTGTG	genotyping F0 Crispr injection	This study
il-34 crispr R	ATCCAAAGTTCCCACATCTGAC	genotyping F0 Crispr injection	This study
csf3r crispr F	GATTGCTGACGTAACTATTGTAC	genotyping F0 Crispr injection	This study
csf3r crispr R	CTCACATTTAAAGTCTTATCAG	genotyping F0 Crispr injection	This study
Morpholinos	Sequence (5'->3')	Function	Reference
csf3r/gcsfr	ATTCAAGCACATACTCACTTCCATT	Splice-blocking	Hall et al., 2014
irf8	AATGTTTCGCTTACTTTGAAAATGG	Splice-blocking	Li et al., 2011
myd88	GTTAAACACTGACCCTGTGGATCAT	Splice-blocking	Bates et al., 2007
pu.1/spi1b	GATATACTGATACTCCATTGGTGGT	Translation-blocking	Rhodes et al., 2005
tnnt2	CATGTTTGCTCTGATCTGACACGCA	Translation-blocking	Sehnert et al., 2002
p53 (negative control)	GCGCCATTGCTTTGCAAGAATTG	Suppresses MO-induced apoptotic effects	Robu et al., 2007
Small-molecule drugs	Final concentration used	Product number	Company
Bay 11-7082	1 µM (in DMSO)	tlrl-b82	InvivoGen
Celastrol	0.22 µM (in DMSO)	ant-cls	InvivoGen
Dexamethasone (water-soluble)	6.5 µM (in water)	D2915 (contains 65 mg of Dex per gram powder)	Sigma-Aldrich
GW2580	25 µM (in DMSO) *some precipitation	72472	Stemcell technologies
17-DMAG	5 µM (in water)	ant-dgl-5	InvivoGen
CRISPR gRNA	Gene-specific target sequence for gRNA	Application	Reference
il-34 gRNA-1	GTCCGAATGCTGGCTTCTCAGGG	CRISPR gRNA synthesis	This study
il-34 gRNA-2	TGGCTTCTCAGGGGGCTGCTGGG	CRISPR gRNA synthesis	This study
il-34 gRNA-3	CCCCCTGAGAAGCCAGCATTCGG	CRISPR gRNA synthesis	This study
csf3r gRNA-9	ACGTAGAAGTGCTGCCCGGGTGG	CRISPR gRNA synthesis	This study
csf3r gRNA-12	AGGTTTATGCGGTCCCACCCGGG	CRISPR gRNA synthesis	This study
csf3r gRNA-13	GTGGTTCCACGGGACGCATACGG	CRISPR gRNA synthesis	This study
